# Supplementary material for: The SOA formation model combined with semiempirical quantum chemistry for predicting UV-Vis absorption of secondary organic aerosols
Source: Royal Society of Chemistry journal article supplement (doi:10.1039/c2cp23906j), 2012-01-01
Supplement: c2cp23906j.pdf [file c2cp23906j.pdf]

## Supplementary Materials

### **The SOA Formation Model Combined with Semiempirical Quantum Chemistry to Predict UV-Vis Absorption of Secondary Organic Aerosols**

Min Zhong<sup>a</sup>, Myoseon Jang\*<sup>a</sup>, Alexander Oliferenko<sup>b</sup> and Alan R. Katritzky<sup>b</sup>

<sup>a</sup> *Department of Environmental Engineering Sciences, University of Florida, Gainesville, 32611,  
Florida, USA*

<sup>b</sup> *Center for Heterocyclic Compounds, Department of Chemistry, University of Florida, Gainesville,  
Florida 32611, USA;*

**Number of Tables: 4**

**Number of Figures: 3**

Table S1. Chemical structure of toluene SOA products

| MCM name <sup>a</sup> | IUPAC name                                                                                     | Structure                                                                             |
|-----------------------|------------------------------------------------------------------------------------------------|---------------------------------------------------------------------------------------|
| MNCATECH              | 3-methyl-6-nitrobenzene-1,2-diol                                                               | 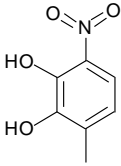   |
| MNNCATCOOH            | (2R)-2-hydroperoxy-2,3-dihydroxy-1-methyl-4-nitro-6,7-dioxabicyclo[3.2.1]oct-3-en-8-yl nitrate |    |
| DNCRES                | 2-methyl-4,6-dinitro-phenol                                                                    |    |
| TLEMUCOOH             | 3-(2-hydroperoxy-1-hydroxy-3-oxo-butyl)-oxirane-2-carbaldehyde                                 |   |
| TLEMUCNO3             | 1-(3-formyloxiran-2-yl)-1-hydroxy-3-oxobutan-2-yl nitrate                                      |  |
| TLBIPEROOH            | (1S,4S,5S)-4-hydroperoxy-1-methyl-6,7-dioxabicyclo[3.2.1]oct-2-en-8-ol                         |  |
| TLBIPERNO3            | (1S,2S,5S)-8-hydroxy-5-methyl-6,7-dioxabicyclo[3.2.1]oct-3-en-2-yl nitrate                     |  |

|            |                                                    |                                                                                       |
|------------|----------------------------------------------------|---------------------------------------------------------------------------------------|
| NC4MDCO2H  | (Z)-2-methyl-3-nitro-4-oxobut-2-enoic acid         | 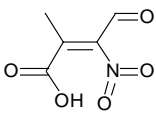   |
| TLEMUCCO   | 3-(1-hydroxy-2,3-dioxobutyl)oxirane-2-carbaldehyde |    |
| TOL1OHNO2  | 2-methyl-6-nitrophenol                             |    |
| ACCOMEPAN  | 3-acetoxy-3-oxopropanoic nitric peroxyanhydride    |    |
| MALDIALPAN | nitric (E)-4-oxobut-2-enoic peroxyanhydride        |   |
| C5COO2NO2  | nitric (E)-4-oxopent-2-enoic peroxyanhydride       |   |
| MALANHY    | furan-2,5-dione                                    |  |
| C5DICARB   | 4-Oxo-pent-2-enal                                  |  |

|                 |                                                        |                                                                                       |
|-----------------|--------------------------------------------------------|---------------------------------------------------------------------------------------|
| MGLYOX          | 2-oxopropanal                                          |    |
| GLYPAN          | nitric 2-oxoacetic peroxyanhydride                     |    |
| GLYOX           | oxalaldehyde                                           |    |
| GLYOX oligomer  | 2-Dihydroxymethyl-[1,3]dioxolane-4,5-diol              |    |
| MGLYOX oligomer | 2-Dihydroxymethyl-2,4-dimethyl-[1,3]dioxolane-4,5-diol |  |

Table S2. Representative products of toluene SOA and their mass percentages at different NO<sub>x</sub> conditions

| Group<br>( <i>i, j</i> ) | <i>k</i> | Products name <sup>a</sup> | <i>MW<sub>k</sub></i> | $\lambda_{\max}^b$<br>(nm)        | <i>f<sup>b</sup></i>                     | <i>F<sub>k</sub><sup>c</sup></i> (%) |                           |                           |
|--------------------------|----------|----------------------------|-----------------------|-----------------------------------|------------------------------------------|--------------------------------------|---------------------------|---------------------------|
|                          |          |                            |                       |                                   |                                          | H NO <sub>x</sub><br>(T1)            | M NO <sub>x</sub><br>(T2) | L NO <sub>x</sub><br>(T3) |
| 1, PO                    | 1        | MNCATECH                   | 169                   | 330, 228                          | 0.05, 0.40                               | 26.27                                | 30.48                     | 26.14                     |
|                          | 2        | MNNCATCOOH                 | 281                   | 270, 199, 189, 188                | 0.3, 0.15, 0.31, 0.03                    | 2.95                                 | 6.36                      | 6.47                      |
|                          | 3        | DNCRES                     | 191                   | 321, 229, 227, 222, 203           | 0.04, 0.17, 0.40, 0.82, 0.08             | 2.00                                 | 0.88                      | 0.32                      |
| 1, H-m                   | 4        | TLEMUCOOH                  | 190                   | 177, 165, 161                     | 0.04, 0.05, 0.03                         | 1.04                                 | 3.04                      | 4.41                      |
|                          | 5        | TLEMUCNO3                  | 190                   | 177, 165, 161                     | 0.04, 0.05, 0.03                         | 2.40                                 | 1.57                      | 1.10                      |
| 2, PO                    | 6        | TLBIPEROOH                 | 174                   | 216, 213, 163, 153, 143           | 0.19, 0.11, 0.13, 0.10, 0.05             | 2.13                                 | 8.68                      | 14.00                     |
|                          | 7        | TLBIPERNO3                 | 174                   | 415, 233                          | 0.06, 0.07                               | 3.85                                 | 3.46                      | 2.78                      |
| 2, H-s                   | 8        | NC4MDCO2H                  | 159                   | 228, 226, 221, 202, 177, 172, 168 | 0.15, 0.08, 0.21, 0.26, 0.22, 0.19, 0.05 | 6.71                                 | 3.19                      | 1.38                      |
| 2, H-f                   | 9        | TLEMUCCO                   | 156                   | 202, 148                          | 0.35, 0.03                               | 0.53                                 | 0.81                      | 1.09                      |
| 3, PO                    | 10       | TOL1OHNO2                  | 153                   | 316, 222                          | 0.04, 0.17                               | 0.77                                 | 0.51                      | 0.23                      |
| 3, H-f                   | 11       | ACCOMEPAN                  | 207                   | 206, 187, 174                     | 0.08, 0.26, 0.25                         | 2.29                                 | 10.34                     | 7.67                      |
| 4, H-m                   | 12       | MALDIALPAN                 | 161                   | 208, 190, 176, 158                | 0.07, 0.27, 0.26, 0.05                   | 0.59                                 | 0.48                      | 0.41                      |
|                          | 13       | C5COO2NO2                  | 175                   | 227, 184, 176                     | 0.59, 0.22, 0.26                         | 0.99                                 | 1.03                      | 1.17                      |
| 5, H-m                   | 14       | MALANHY                    | 98                    | 230                               | 0.17                                     | 2.26                                 | 1.00                      | 1.01                      |
|                          | 15       | C5DICARB                   | 98                    | 223, 166, 162, 155                | 0.65, 0.06, 0.09, 0.42                   | 0.55                                 | 0.21                      | 0.14                      |
|                          | 16       | MGLYOX (oligomer)          | 72                    | 193, 171, 160, 155                | 0.20, 0.34                               | 4.98                                 | 2.55                      | 2.16                      |
|                          | 17       | GLYPAN                     | 135                   | 213, 189, 183, 168                | 0.13, 0.04, 0.47, 0.53                   | 1.12                                 | 0.53                      | 0.33                      |
| 5, H-f                   | 18       | GLYOX (oligomer)           | 58                    | 196, 182, 163, 160                | 0.14, 0.06, 0.39, 0.11                   | 37.17                                | 23.26                     | 27.30                     |

a: The names of chemicals are from MCM mechanism; b:  $\lambda_{\max}$  and *f* are calculated using NDDO based AM1 semiempirical quantum chemistry method; c: *F<sub>k</sub>* is the mass percentage of the *k*th species, obtained by the mass balance of chemical compounds in toluene SOA.

Table S3. Chemical structure of  $\alpha$ -pinene SOA from MCM mechanism

| MCM name  | IUPAC name                                                                   | Structure |
|-----------|------------------------------------------------------------------------------|-----------|
| C811PAN   | 2,2-dimethyl-3-(2-(nitroperoxy)-2-oxoethyl)cyclobutanecarboxylic acid        |           |
| PINIC     | 3-(carboxymethyl)-2,2-dimethylcyclobutanecarboxylic acid                     |           |
| C921OOH   | 1-(1-hydroperoxy-3-(hydroxymethyl)-2,2-dimethylcyclobutyl)-2-hydroxyethanone |           |
| C812OOH   | 1-hydroperoxy-3-(hydroxymethyl)-2,2-dimethylcyclobutanecarboxylic acid       |           |
| HOPINONIC | 2-(3-(2-hydroxyacetyl)-2,2-dimethylcyclobutyl)acetic acid                    |           |
| C920PAN   | 2-(3-(2-hydroxyacetyl)-2,2-dimethylcyclobutyl)acetic nitric peroxyanhydride  |           |

|         |                                                                     |                                                                                       |
|---------|---------------------------------------------------------------------|---------------------------------------------------------------------------------------|
| C98OOH  | 6-hydroperoxy-5-(hydroxymethyl)-6-methylheptane-2,3-dione           | 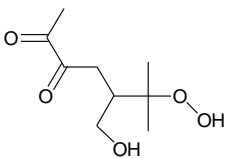   |
| C98NO3  | 3-(hydroxymethyl)-2-methyl-5,6-dioxoheptan-2-yl nitrate             |    |
| C922OOH | 6-hydroperoxy-1-hydroxy-5-(hydroxymethyl)-6-methylheptane-2,3-dione |     |
| C7PAN3  | nitric 3,5,6-trioxoheptanoic peroxyanhydride                        |    |
| C10PAN2 | 2-(3-acetyl-2,2-dimethylcyclobutyl)acetic nitric peroxyanhydride    |   |
| C97OOH  | 1-(1-hydroperoxy-3-(hydroxymethyl)-2,2-dimethylcyclobutyl)ethanone  |  |
| C717NO3 | 1,5,6-trioxoheptan-3-yl nitrate                                     |  |

|          |                                                                         |                                                                                       |
|----------|-------------------------------------------------------------------------|---------------------------------------------------------------------------------------|
| C108OOH  | 3-(2-hydroperoxypropan-2-yl)-5,6-dioxoheptanal                          | 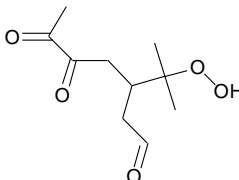   |
| APINAOOH | 2-hydroperoxy-2,6,6-trimethylbicyclo[3.1.1]heptan-3-ol                  |    |
| APINANO3 | 3-hydroxy-2,6,6-trimethylbicyclo[3.1.1]heptan-2-yl nitrate              |    |
| APINBNO3 | 2-hydroxy-2,6,6-trimethylbicyclo[3.1.1]heptan-3-yl nitrate              |   |
| PINONIC  | 2-(3-acetyl-2,2-dimethylcyclobutyl)acetic acid                          |  |
| C89PAN   | 2,2-dimethyl-3-(2-oxoethyl)cyclobutanecarboxylic nitric peroxyanhydride |   |
| C107OH   | 2-(3-acetyl-3-hydroxy-2,2-dimethylcyclobutyl)acetaldehyde               |  |



|            |                                                             |                                                                                       |
|------------|-------------------------------------------------------------|---------------------------------------------------------------------------------------|
| C109OH     | 2-(3-(2-hydroxyacetyl)-2,2-dimethylcyclobutyl)acetaldehyde  | 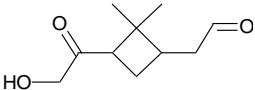   |
| C5PAN9     | nitric 3,4-dioxopentanoic peroxyanhydride                   |    |
| CO235C6CHO | 3,5,6-trioxoheptanal                                        |    |
| C109CO     | 2-(2,2-dimethyl-3-(2-oxoethyl)cyclobutyl)-2-oxoacetaldehyde |   |
| PINAL      | 2-(3-acetyl-2,2-dimethylcyclobutyl)acetaldehyde             |  |

Table S4. Representative products of  $\alpha$ -pinene SOA and their mass percentages in SOA at different  $\text{NO}_x$  conditions

| Group<br>( <i>i,j</i> ) | <i>k</i> | Products name <sup>a</sup> | $MW_k$ | $\lambda_{\text{max}}^b$<br>(nm) | $f^b$                              | $F_k^c$ (%)              |                          |
|-------------------------|----------|----------------------------|--------|----------------------------------|------------------------------------|--------------------------|--------------------------|
|                         |          |                            |        |                                  |                                    | HNO <sub>x</sub><br>(A1) | LNO <sub>x</sub><br>(A2) |
| 1, H-s                  | 1        | C811PAN                    | 247    | 183, 161                         | 0.27, 0.11                         | 4.59                     | 3.98                     |
|                         | 2        | PINIC                      | 186    | 181, 174, 164, 141, 135          | 0.25, 0.06, 0.03, 0.05, 0.09       | 0.02                     | 1.98                     |
|                         | 3        | C921OOH                    | 204    | 192, 186, 178, 167, 160, 156     | 0.09, 0.12, 0.09, 0.08, 0.06, 0.07 | 0.09                     | 1.30                     |
|                         | 4        | C812OOH                    | 190    | 187, 186, 169, 164, 157          | 0.14, 0.10, 0.09, 0.05, 0.11       | 0.04                     | 0.92                     |
|                         | 5        | HOPINONIC                  | 200    | 176, 171, 169, 162, 139          | 0.25, 0.22, 0.12, 0.03, 0.07       | 0.04                     | 1.19                     |
| 1, H-m                  | 6        | C920PAN                    | 261    | 196, 182, 171                    | 0.07, 0.03, 0.06                   | 8.40                     | 3.91                     |
|                         | 7        | C98OOH                     | 204    | 201, 167                         | 0.29, 0.14                         | 2.72                     | 10.43                    |
|                         | 8        | C98NO3                     | 233    | 188, 183                         | 0.18, 0.03                         | 6.46                     | 2.62                     |
|                         | 9        | C922OOH                    | 220    | 204, 177                         | 0.32, 0.17                         | 0.09                     | 1.34                     |
| 1, H-f                  | 10       | C7PAN3                     | 233    | 205, 192                         | 0.08, 0.35                         | 18.43                    | 3.54                     |
| 2, H-s                  | 11       | C10PAN2                    | 245    | 187, 171, 167                    | 0.04, 0.08, 0.04                   | 16.30                    | 5.97                     |
|                         | 12       | C97OOH                     | 188    | 197, 186, 180, 157, 142, 135     | 0.05, 0.05, 0.23, 0.05, 0.06, 0.09 | 0.49                     | 6.13                     |
| 2, H-f                  | 13       | C717NO3                    | 203    | 184, 182, 177, 174, 165, 155     | 0.08, 0.19, 0.05, 0.06, 0.09, 0.06 | 5.28                     | 3.12                     |
|                         | 14       | C108OOH                    | 216    | 202                              | 0.26                               | 4.39                     | 14.88                    |
| 3, PO                   | 15       | APINAOOH                   | 186    | 160, 158, 156, 153, 139, 137     | 0.16, 0.13, 0.07, 0.17, 0.09, 0.10 | 0.07                     | 2.32                     |
|                         | 16       | APINANO3                   | 215    | 174, 162, 151, 147, 146          | 0.07, 0.06, 0.2, 0.06, 0.08        | 0.93                     | 2.42                     |
|                         | 17       | APINBNO3                   | 215    | 202, 168, 158, 153               | 0.05, 0.04, 0.06, 0.22             | 0.59                     | 1.26                     |
| 3, H-s                  | 18       | PINONIC                    | 184    | 173, 169, 165, 151               | 0.31, 0.04, 0.15, 0.08, 0.05       | 0.09                     | 0.70                     |
| 3, H-m                  | 19       | C89PAN                     | 231    | 179, 169                         | 0.05, 0.06                         | 3.36                     | 2.14                     |
|                         | 20       | C107OH                     | 200    | 182, 175, 162, 145, 141          | 0.25, 0.06, 0.05, 0.06, 0.14       | 0.36                     | 3.53                     |
|                         | 21       | C109OH                     | 200    | 181, 173, 163, 140, 135          | 0.25, 0.06, 0.03, 0.05, 0.09       | 0.28                     | 0.82                     |
|                         | 22       | C5PAN9                     | 191    | 199, 184, 174, 168               | 0.05, 0.22, 0.25, 0.54             | 2.60                     | 0.60                     |
| 4, H-f                  | 23       | CO235C6CHO                 | 156    | 159                              | 0.01                               | 2.88                     | 2.85                     |
|                         | 24       | C109CO                     | 182    | 200                              | 0.25                               | 0.09                     | 0.42                     |
| 5, H-m                  | 25       | PINAL                      | 168    | 168, 164, 163, 157, 156, 152     | 0.03, 0.15, 0.06, 0.14, 0.05, 0.06 | 20.12                    | 19.46                    |

a: The names of chemicals are from MCM mechanism; b:  $\lambda_{\text{max}}$  and  $f$  are calculated using NDDO based AM1 semiempirical quantum chemistry method; c:  $F_k$  is the mass percentage of the  $k$ th species, obtained by the mass balance of chemical compounds in  $\alpha$ -pinene SOA

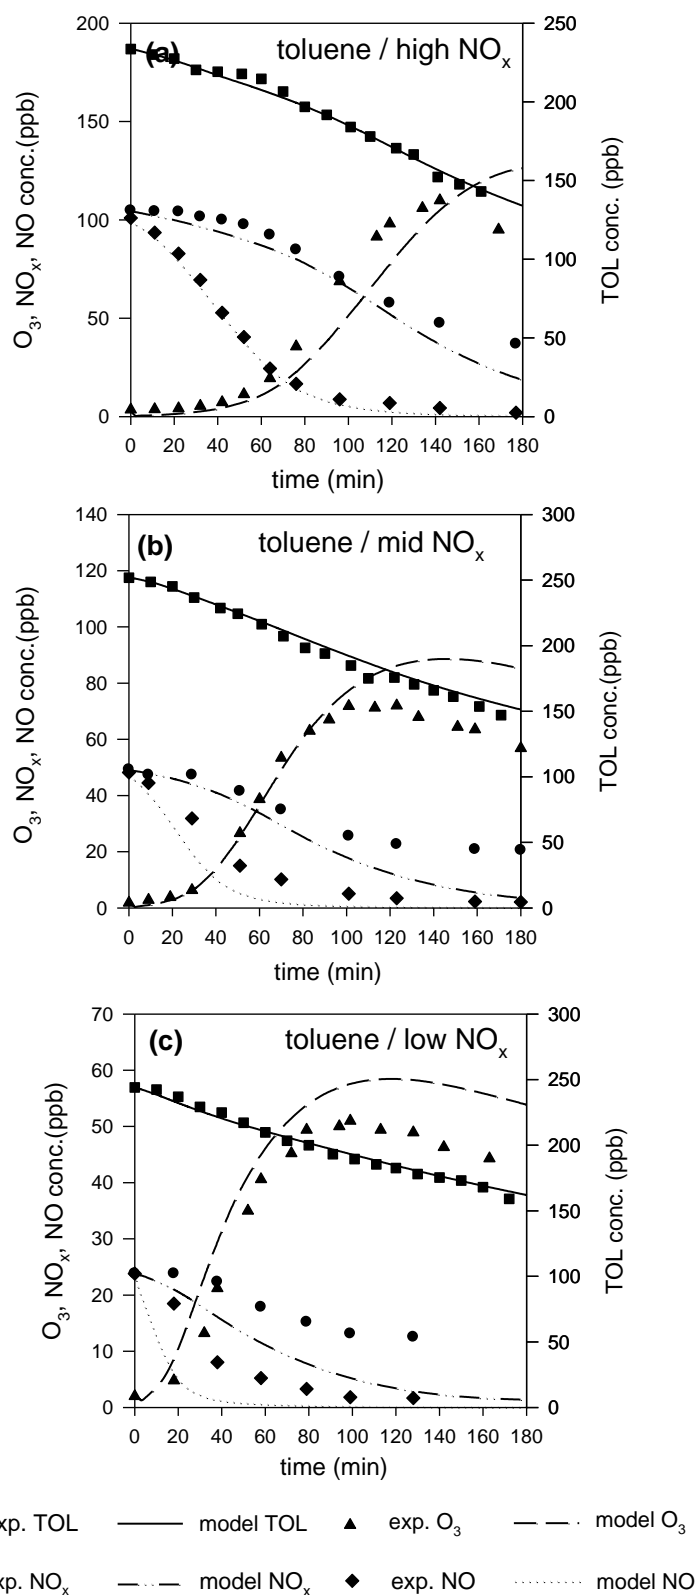

Figure S1: Comparison of model simulated and measured concentrations of toluene,  $\text{O}_3$ ,  $\text{NO}_x$ , and NO for experiments at high  $\text{NO}_x$ , mid  $\text{NO}_x$  and low  $\text{NO}_x$  levels (T1, T2 and T3)

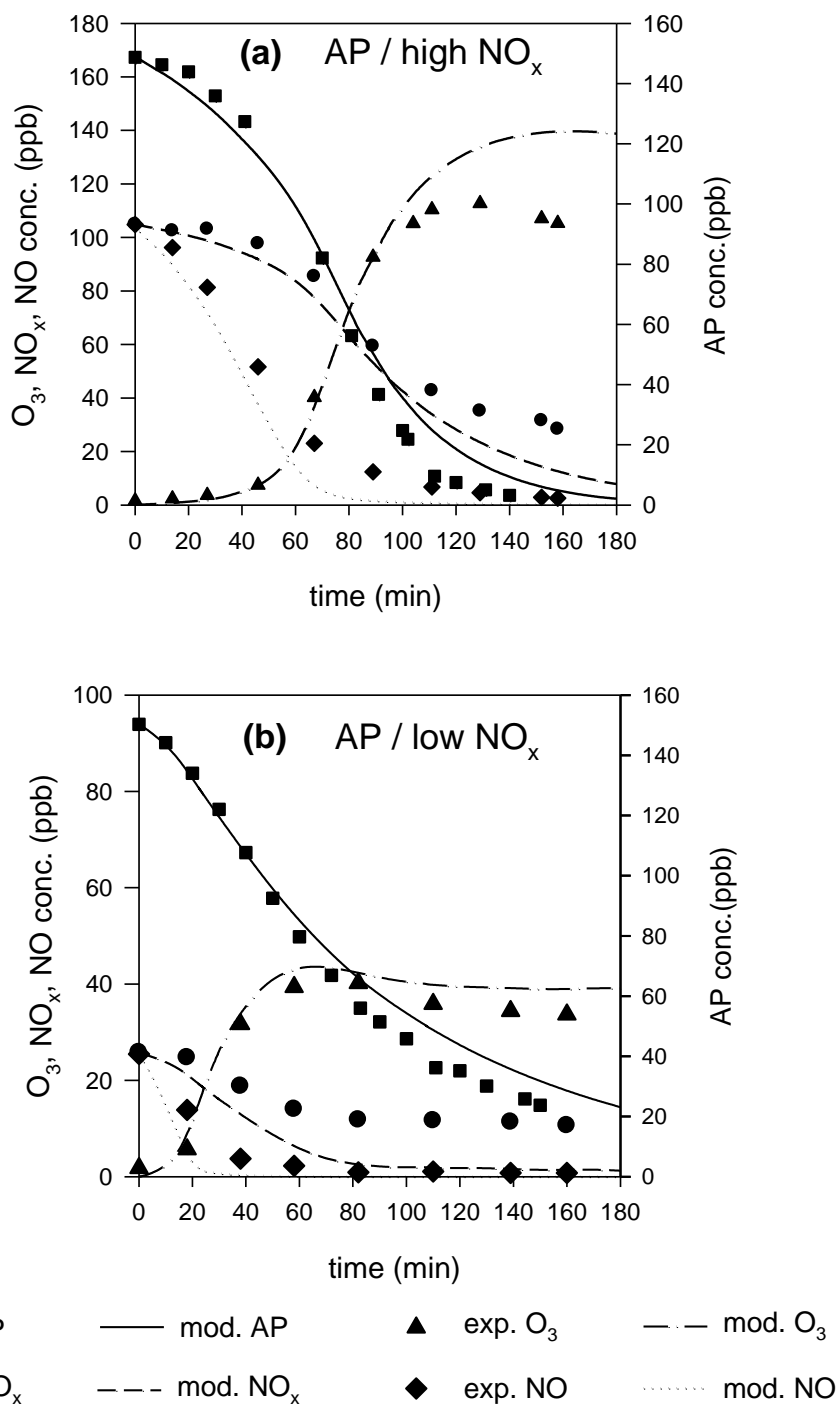

Figure S2: Comparison of model simulated and measured concentrations of  $\alpha$ -pinene,  $O_3$ ,  $NO_x$ , and NO for experiments at high  $NO_x$  and low  $NO_x$  levels (A1 and A2)

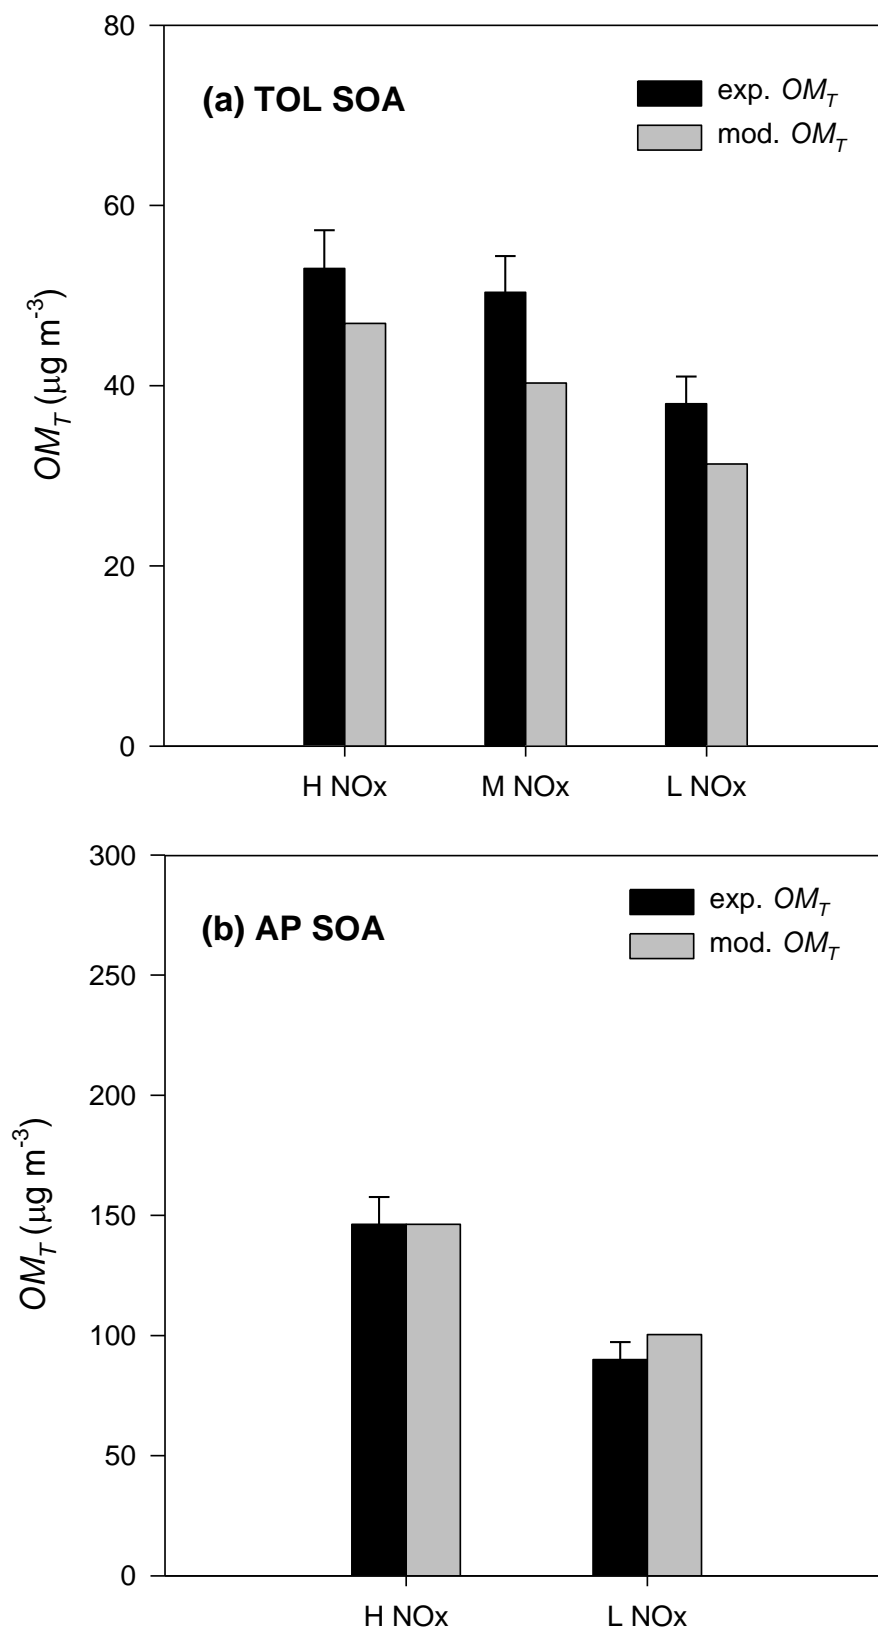

Figure S3: Comparison of the predicted  $OM_T$  and the measured  $OM_T$  for TOL SOA (a) and AP SOA (b) under different  $\text{NO}_x$  conditions. T1-T3 for TOL SOA and A1-A2 for AP SOA (see Table 1)
